# Supplementary material for: A crystalline stannyne
Source: Research Square preprint supplement (doi:10.21203/rs.3.rs-3050761/v1), 2024-04-03
Supplement: Supplementary file 1 [file 58659d45cf2cf062bd100d0c.xlsx]

## Sheet: Compound 3
Cartesian Cooradinations					BP86-D3(BJ)/def2-TZVPP
3
0， 1
50 0.576371000 2.798138000 14.394628000
15 3.791553000 3.399911000 13.197692000
7 4.950026000 4.519344000 13.717953000
7 4.937580000 2.445072000 12.400952000
6 4.201947000 0.009556000 13.901396000
1 4.254976000 1.045727000 14.269379000
6 -1.667821000 5.395879000 15.793465000
6 6.261698000 2.648975000 13.007445000
1 7.048827000 2.359495000 12.299548000
1 6.381019000 2.038375000 13.921229000
6 4.619796000 5.908963000 13.872752000
6 4.386609000 0.038696000 12.394590000
6 6.318109000 4.146275000 13.340003000
1 7.012176000 4.346502000 14.169976000
1 6.650690000 4.729249000 12.463187000
6 -1.452362000 2.906007000 11.943025000
6 4.494387000 6.431038000 15.177672000
6 0.282501000 1.385091000 10.917249000
6 0.064598000 6.469533000 14.440016000
6 -0.854330000 1.551482000 11.735617000
6 -3.004099000 4.684852000 11.388172000
1 -3.783286000 5.090556000 10.740476000
6 -1.138821000 6.017746000 16.929265000
1 -1.607084000 5.831569000 17.899617000
6 -1.562474000 4.902347000 13.326268000
6 -1.062489000 5.626871000 14.535329000
6 -2.455127000 3.427733000 11.113060000
1 -2.807761000 2.848633000 10.256300000
6 -0.993801000 3.650527000 13.041516000
6 2.209384000 3.413977000 13.229147000
6 4.648592000 5.523576000 16.386995000
1 5.349449000 4.724543000 16.097994000
6 4.190054000 7.791144000 15.315021000
1 4.088264000 8.221590000 16.311275000
6 -2.566638000 5.420006000 12.495024000
1 -3.003581000 6.397075000 12.714354000
6 4.646935000 1.233863000 11.695472000
6 2.802839000 -0.516206000 14.261997000
1 2.025454000 0.035610000 13.716636000
1 2.615176000 -0.405671000 15.339246000
1 2.700549000 -1.581735000 14.007907000
6 -1.390812000 0.444160000 12.434912000
6 0.857205000 0.112174000 10.799424000
1 1.743042000 -0.010446000 10.172492000
6 0.329513000 -0.998134000 11.466099000
6 3.304747000 4.851062000 16.722860000
1 3.419300000 4.153775000 17.565852000
1 2.913909000 4.295075000 15.860392000
1 2.551647000 5.604064000 16.993797000
6 4.663817000 1.279415000 10.280580000
6 4.261198000 -1.145048000 11.654017000
1 4.074063000 -2.084529000 12.175674000
6 4.017020000 8.604506000 14.194301000
1 3.778016000 9.661530000 14.321187000
6 -2.854083000 4.472632000 15.908649000
1 -3.218139000 4.425377000 16.943014000
1 -2.593086000 3.452117000 15.587391000
1 -3.680565000 4.795908000 15.259374000
6 4.812439000 2.605702000 9.547382000
1 4.248702000 3.348815000 10.133725000
6 0.559573000 7.077936000 15.601585000
1 1.438058000 7.721624000 15.520221000
6 4.442866000 6.713210000 12.725750000
6 -0.024583000 6.864730000 16.852557000
6 4.568477000 6.156413000 11.314536000
1 4.864604000 5.100627000 11.388596000
6 0.766008000 6.666368000 13.126680000
1 1.354603000 5.762785000 12.892439000
1 1.459214000 7.514509000 13.171378000
1 0.058523000 6.816178000 12.300193000
6 4.524413000 0.072997000 9.584401000
1 4.540425000 0.074269000 8.494826000
6 4.141768000 8.068789000 12.914109000
1 3.994833000 8.710526000 12.043678000
6 4.353161000 -1.133947000 10.265631000
1 4.260239000 -2.065311000 9.704914000
6 -0.790768000 -0.810757000 12.285710000
1 -1.215892000 -1.666178000 12.817718000
6 0.541568000 7.510190000 18.092750000
1 0.925107000 6.754459000 18.796125000
1 -0.223029000 8.091309000 18.629912000
1 1.369231000 8.187985000 17.843984000
6 5.305648000 -0.801952000 14.599055000
1 5.280009000 -1.854865000 14.280899000
1 5.172525000 -0.777055000 15.690306000
1 6.305226000 -0.408682000 14.364014000
6 0.900798000 2.564188000 10.220109000
1 0.145684000 3.206859000 9.748161000
1 1.616672000 2.232975000 9.458300000
1 1.444599000 3.178842000 10.958745000
6 5.223728000 6.238735000 17.615842000
1 4.514709000 6.972242000 18.027579000
1 6.160213000 6.764905000 17.381675000
1 5.428809000 5.508638000 18.411620000
6 -2.598785000 0.611790000 13.322371000
1 -2.905732000 -0.349653000 13.753717000
1 -3.448211000 1.035726000 12.767331000
1 -2.393962000 1.310410000 14.148350000
6 0.945176000 -2.366060000 11.317081000
1 1.493670000 -2.656322000 12.227168000
1 1.654112000 -2.394093000 10.480413000
6 5.667700000 6.883522000 10.522349000
1 5.417305000 7.943951000 10.373474000
1 5.789671000 6.426599000 9.529683000
1 6.634758000 6.839604000 11.043777000
6 4.225926000 2.587871000 8.130253000
1 4.830357000 1.972346000 7.447144000
1 4.212167000 3.608239000 7.722130000
1 3.197804000 2.203346000 8.114833000
6 6.278582000 3.071477000 9.485133000
1 6.703975000 3.226663000 10.483120000
1 6.355562000 4.022497000 8.938208000
1 6.897335000 2.327060000 8.962341000
6 3.227599000 6.184599000 10.563287000
1 2.476517000 5.574733000 11.080504000
1 3.354529000 5.783286000 9.546916000
1 2.838206000 7.209339000 10.476686000
1 0.175403000 -3.132541000 11.145365000

## Sheet: Compound 5
Cartesian Cooradinations							BP86-D3(BJ)/def2-TZVPP
5
0，1
50 2.744581000 3.117615000 4.506677000
15 -0.541995000 3.061329000 4.991577000
7 -1.145878000 1.662678000 5.733305000
7 -2.037371000 3.835976000 5.033646000
6 -0.353981000 0.495852000 5.970290000
6 3.938901000 5.588346000 3.012579000
6 4.317389000 3.511652000 1.807316000
6 4.434110000 6.498672000 5.286300000
6 0.749477000 3.744363000 4.376434000
6 3.514704000 6.354550000 4.222446000
6 4.546002000 6.293805000 1.961453000
1 4.640188000 7.378809000 2.039942000
6 3.805428000 4.186111000 2.932528000
6 3.109361000 0.995645000 4.774798000
1 2.151877000 0.558062000 5.092057000
1 3.437401000 0.450339000 3.883223000
6 -2.537139000 5.944881000 3.901312000
6 5.031994000 5.622579000 0.839312000
1 5.500715000 6.179937000 0.026519000
6 4.926979000 4.233844000 0.768629000
1 5.316883000 3.692044000 -0.095474000
6 0.411003000 0.431723000 7.159665000
6 -2.065673000 5.274327000 5.048285000
6 4.235675000 2.027035000 1.689656000
6 2.254188000 6.982237000 4.283286000
6 4.069825000 7.255970000 6.403847000
1 4.781515000 7.359089000 7.227599000
6 5.801776000 5.867216000 5.206088000
1 5.739856000 4.792639000 4.980555000
1 6.349114000 5.994557000 6.149207000
1 6.398703000 6.316427000 4.397626000
6 3.607893000 3.310552000 6.493675000
1 4.237927000 4.195646000 6.641120000
1 2.767554000 3.403776000 7.200131000
6 -2.611911000 1.623758000 5.770173000
1 -2.951810000 1.096970000 6.673013000
1 -3.021130000 1.092088000 4.892906000
6 -3.059940000 3.094730000 5.778049000
1 -4.043019000 3.213302000 5.298938000
1 -3.136210000 3.474667000 6.812404000
6 -0.319993000 -0.535862000 5.011633000
6 5.284436000 1.224045000 2.183101000
6 2.825827000 7.895572000 6.481804000
6 -2.104302000 8.053382000 5.033087000
1 -2.117273000 9.144493000 5.025464000
6 3.111871000 1.433943000 1.080958000
6 -2.952162000 5.154530000 2.671425000
1 -3.314948000 4.177597000 3.027041000
6 -2.549391000 7.345262000 3.915791000
1 -2.904772000 7.890637000 3.041372000
6 1.962213000 2.285357000 0.603980000
1 2.305718000 3.098507000 -0.050844000
1 1.446189000 2.767432000 1.450830000
1 1.225478000 1.681730000 0.058725000
6 4.099284000 -0.777587000 1.427551000
6 5.201521000 -0.165688000 2.036274000
1 6.015832000 -0.787042000 2.418687000
6 1.245007000 6.812819000 3.181908000
1 1.697119000 6.931456000 2.187471000
1 0.419308000 7.527516000 3.290860000
1 0.820318000 5.796047000 3.239607000
6 -1.605145000 5.971026000 6.186050000
6 -1.636747000 7.371326000 6.154930000
1 -1.281349000 7.932839000 7.020715000
6 3.067450000 0.040062000 0.954205000
1 2.200135000 -0.418808000 0.473819000
6 6.442527000 1.841350000 2.924320000
1 6.123713000 2.164174000 3.929269000
1 6.830125000 2.732171000 2.412105000
1 7.260220000 1.119746000 3.049890000
6 1.937400000 7.746976000 5.414365000
1 0.957038000 8.225888000 5.460462000
6 1.150114000 -0.732124000 7.399986000
1 1.760048000 -0.805554000 8.299086000
6 4.372633000 2.019751000 6.679021000
6 1.138552000 -1.793207000 6.492713000
1 1.718449000 -2.693057000 6.703044000
6 0.421927000 -1.689037000 5.303848000
1 0.462118000 -2.499886000 4.574737000
6 0.450128000 1.610383000 8.121106000
1 0.523709000 2.520122000 7.500369000
6 -0.972213000 -0.379275000 3.648966000
1 -1.515173000 0.575811000 3.638679000
6 4.003125000 -2.279035000 1.330576000
1 4.990421000 -2.737991000 1.181497000
1 3.351218000 -2.587113000 0.501705000
1 3.582697000 -2.704434000 2.256419000
6 -4.080284000 5.817151000 1.871341000
1 -3.747873000 6.751697000 1.395578000
1 -4.947098000 6.049680000 2.506424000
1 -4.413689000 5.146938000 1.066109000
6 2.460161000 8.722092000 7.689127000
1 2.513469000 8.126886000 8.613717000
1 1.441224000 9.123214000 7.602229000
1 3.146107000 9.573945000 7.814983000
6 4.136643000 0.942970000 5.881079000
6 -1.724249000 4.884179000 1.780022000
1 -2.000778000 4.252057000 0.922908000
1 -0.924307000 4.384938000 2.344646000
1 -1.318686000 5.830295000 1.391551000
6 -1.069733000 5.254909000 7.417091000
1 -1.152675000 4.171391000 7.247625000
6 -1.977266000 -1.501101000 3.348256000
1 -2.458856000 -1.336266000 2.373526000
1 -2.761864000 -1.553196000 4.116776000
1 -1.480658000 -2.481898000 3.312296000
6 0.419360000 5.553646000 7.641464000
1 0.578527000 6.613671000 7.880393000
1 1.004768000 5.316888000 6.744325000
1 0.804867000 4.957482000 8.482246000
6 -1.903439000 5.582842000 8.666489000
1 -1.534476000 5.016268000 9.533758000
1 -2.964915000 5.336207000 8.519189000
1 -1.840972000 6.652533000 8.914389000
6 1.668862000 1.593175000 9.049010000
1 1.735553000 2.545657000 9.593256000
1 2.599294000 1.452517000 8.483010000
1 1.595252000 0.792307000 9.800392000
6 5.387969000 2.056645000 7.792870000
1 6.108517000 2.873422000 7.619472000
1 5.954657000 1.125050000 7.909308000
1 4.901302000 2.280141000 8.757431000
6 0.114226000 -0.277733000 2.567051000
1 0.715251000 -1.196815000 2.518485000
1 0.797939000 0.554171000 2.778723000
1 -0.337397000 -0.110389000 1.578341000
6 4.834836000 -0.386171000 5.996967000
1 4.097095000 -1.183191000 6.188430000
1 5.594474000 -0.427766000 6.786745000
1 5.317983000 -0.639921000 5.039024000
6 -0.844243000 1.713583000 8.946990000
1 -0.980303000 0.812070000 9.562635000
1 -1.728889000 1.826488000 8.308580000
1 -0.801245000 2.582591000 9.619542000

## Sheet: Compound 6
Cartesian Cooradinations
6					BP86-D3(BJ)/def2-TZVPP
0, 1
50 2.527946000 17.904462000 10.551090000
17 0.966402000 16.296812000 11.287334000
17 1.213973000 19.835956000 11.007518000
15 5.413820000 16.770054000 12.076099000
7 6.395487000 17.490129000 13.332340000
7 4.910127000 15.521106000 13.134829000
6 2.968759000 17.780142000 8.436991000
6 2.676810000 16.640941000 7.666160000
6 3.584782000 18.911788000 7.861228000
6 3.859659000 18.910134000 6.487199000
1 4.340327000 19.783469000 6.043216000
6 2.124357000 15.388446000 8.256222000
6 2.964869000 16.673937000 6.290639000
1 2.740836000 15.790336000 5.690589000
6 3.681371000 13.399634000 12.998343000
6 4.871056000 14.138286000 12.763867000
6 3.540184000 17.800102000 5.703518000
1 3.758194000 17.805876000 4.634439000
6 2.994861000 14.478383000 8.887786000
6 0.744031000 15.111260000 8.167926000
6 5.169212000 19.963952000 9.484491000
6 6.000783000 13.509328000 12.184937000
6 8.172685000 18.906343000 12.404829000
6 3.198449000 21.232252000 8.775157000
6 4.005803000 17.978993000 12.110571000
1 4.445064000 18.979219000 11.971334000
1 3.435288000 17.964338000 13.048724000
6 7.010992000 18.769863000 13.211703000
6 5.058053000 15.919273000 14.547319000
1 5.149901000 15.021987000 15.169631000
1 4.177425000 16.489422000 14.891080000
6 3.989111000 20.063844000 8.716867000
6 2.468853000 14.019102000 13.673921000
1 2.535291000 15.107101000 13.520734000
6 6.320683000 16.783280000 14.616890000
1 6.275074000 17.490289000 15.457073000
1 7.215354000 16.148252000 14.763651000
6 6.471839000 19.899137000 13.879687000
6 5.199744000 19.833161000 14.710001000
1 4.776525000 18.827308000 14.588079000
6 3.641453000 12.053373000 12.614538000
1 2.732302000 11.478486000 12.791822000
6 5.889464000 12.174823000 11.768734000
1 6.749053000 11.690596000 11.301588000
6 3.575886000 22.255353000 9.647970000
1 2.950100000 23.149030000 9.710655000
6 6.102303000 18.792862000 9.323154000
1 5.590826000 17.822716000 9.377012000
1 6.876205000 18.810851000 10.097967000
1 6.597838000 18.825970000 8.340069000
6 2.467967000 13.295298000 9.419941000
1 3.143230000 12.598768000 9.920555000
6 0.260067000 13.915464000 8.704297000
1 -0.811654000 13.708295000 8.647177000
6 5.493809000 20.053749000 16.204951000
1 6.243161000 19.343854000 16.583330000
1 4.577482000 19.939106000 16.802130000
1 5.884587000 21.067236000 16.379347000
6 7.134841000 21.129695000 13.767966000
1 6.734041000 21.998105000 14.293589000
6 5.500919000 21.004064000 10.364233000
1 6.403566000 20.915325000 10.972421000
6 2.467058000 13.726533000 15.188388000
1 1.605907000 14.211465000 15.671431000
1 3.378805000 14.076022000 15.688417000
1 2.388137000 12.642901000 15.363876000
6 4.709699000 22.152994000 10.464981000
6 8.803846000 17.688075000 11.749569000
1 7.987870000 17.026194000 11.422301000
6 9.659525000 18.007293000 10.518366000
1 10.580153000 18.546587000 10.787044000
1 9.112690000 18.613135000 9.783106000
1 9.963338000 17.072280000 10.026860000
6 4.470964000 14.752503000 9.005717000
1 4.892769000 15.145546000 8.069959000
1 5.011592000 13.840708000 9.286969000
1 4.693335000 15.498885000 9.788909000
6 1.106656000 12.992747000 9.332392000
6 7.362199000 14.179896000 12.081406000
1 7.279096000 15.193728000 12.496342000
6 4.723078000 11.445767000 11.980048000
1 4.660223000 10.403759000 11.662594000
6 1.141689000 13.538066000 13.069475000
1 0.941379000 12.486199000 13.323338000
1 1.139995000 13.641770000 11.978693000
1 0.310681000 14.135266000 13.469539000
6 4.143953000 20.838283000 14.217168000
1 4.474705000 21.873533000 14.383902000
1 3.199119000 20.698739000 14.761636000
1 3.936215000 20.722944000 13.145336000
6 1.953983000 21.358763000 7.936958000
1 2.188594000 21.349230000 6.862081000
1 1.422110000 22.290490000 8.165972000
1 1.268398000 20.520362000 8.125121000
6 8.773914000 20.165088000 12.290373000
1 9.660837000 20.281271000 11.667910000
6 8.271810000 21.270249000 12.978610000
1 8.764354000 22.239799000 12.891040000
6 7.846913000 14.314113000 10.630918000
1 8.846466000 14.771665000 10.599330000
1 7.163276000 14.943965000 10.047271000
1 7.914572000 13.332521000 10.139105000
6 9.641950000 16.925182000 12.792110000
1 10.095384000 16.028551000 12.345601000
1 9.030320000 16.611754000 13.647376000
1 10.453133000 17.564904000 13.170632000
6 0.564085000 11.701765000 9.890666000
1 1.305681000 11.205845000 10.530391000
1 0.295072000 11.002520000 9.083346000
1 -0.343137000 11.873848000 10.487736000
6 8.386637000 13.423407000 12.947126000
1 8.541278000 12.398856000 12.579000000
1 8.046051000 13.354596000 13.990003000
1 9.358007000 13.937076000 12.935099000
6 5.066797000 23.260815000 11.421913000
1 6.008836000 23.045698000 11.940750000
1 4.282445000 23.391284000 12.182899000
1 5.171212000 24.222120000 10.896874000
6 -0.203413000 16.120202000 7.572830000
1 -0.248164000 17.024346000 8.200867000
1 -1.219046000 15.711024000 7.500974000
1 0.113741000 16.445159000 6.571798000

## Sheet: Compound 3 (simplified)
Cartesian Cooradinations
3'					BP86-D3(BJ)/def2-TZVPP
0, 1
50 -1.127348000 -0.924734000 1.546076000
15 1.381668000 0.777926000 -0.248485000
7 1.679572000 1.841480000 -1.523180000
7 2.987252000 0.246117000 -0.185842000
6 4.344080000 2.130003000 1.604065000
1 3.792369000 2.332104000 0.676905000
6 -4.306246000 0.229046000 2.022932000
6 3.781600000 0.713058000 -1.330604000
1 3.802863000 -0.063261000 -2.114431000
1 4.813582000 0.911984000 -1.014596000
6 0.742683000 2.844137000 -1.939338000
6 4.319571000 0.630467000 1.844014000
6 3.096064000 1.991193000 -1.854800000
1 3.521159000 2.899715000 -1.388383000
1 3.215779000 2.084650000 -2.943982000
6 -2.401241000 -2.346969000 -1.164697000
6 0.620629000 4.036965000 -1.191664000
6 -0.229085000 -3.441835000 -1.846918000
6 -3.262098000 1.935167000 0.606761000
6 -1.397833000 -3.449460000 -1.056650000
6 -4.280520000 -1.401860000 -2.393716000
1 -4.948609000 -1.421083000 -3.256294000
6 -4.378557000 1.166209000 3.061418000
1 -4.827777000 0.866942000 4.011881000
6 -3.575130000 -0.406212000 -0.301305000
6 -3.725677000 0.610277000 0.788206000
6 -3.270606000 -2.357667000 -2.270969000
1 -3.155427000 -3.133508000 -3.031688000
6 -2.537621000 -1.354096000 -0.181297000
6 -0.064361000 0.283616000 0.185589000
6 1.318950000 4.224948000 0.143966000
1 2.026292000 3.394026000 0.277530000
6 -0.234633000 5.036659000 -1.671275000
1 -0.342986000 5.964526000 -1.107273000
6 -4.442047000 -0.431070000 -1.402043000
1 -5.242196000 0.308955000 -1.477463000
6 3.603304000 -0.258459000 1.006745000
6 3.598972000 2.860080000 2.734531000
1 2.567195000 2.493078000 2.821192000
1 3.567781000 3.942270000 2.542028000
1 4.096105000 2.702288000 3.702477000
6 -1.682587000 -4.565165000 -0.238729000
6 0.592950000 -4.574429000 -1.862055000
1 1.477809000 -4.572313000 -2.503803000
6 0.316106000 -5.700506000 -1.078675000
6 0.292361000 4.128031000 1.286966000
1 0.788764000 4.229275000 2.262745000
1 -0.228895000 3.161350000 1.260540000
1 -0.459783000 4.926497000 1.202679000
6 3.482116000 -1.624923000 1.332300000
6 4.973424000 0.110240000 2.967088000
1 5.533681000 0.783151000 3.618809000
6 -0.962612000 4.855983000 -2.846400000
1 -1.622095000 5.646635000 -3.207464000
6 -4.851287000 -1.162868000 2.222090000
1 -5.434756000 -1.224673000 3.149689000
1 -4.040687000 -1.906499000 2.282332000
1 -5.487428000 -1.467794000 1.379540000
6 2.676982000 -2.591335000 0.485022000
1 2.079885000 -2.003891000 -0.226871000
6 -3.351625000 2.836235000 1.673940000
1 -2.982609000 3.854926000 1.530904000
6 -0.029358000 2.622429000 -3.098291000
6 -3.895124000 2.470380000 2.910965000
6 -0.002723000 1.299932000 -3.842455000
1 0.674575000 0.630204000 -3.293869000
6 -2.633856000 2.351214000 -0.689816000
1 -1.692506000 1.792128000 -0.828261000
1 -2.400613000 3.422299000 -0.696545000
1 -3.275908000 2.125566000 -1.551456000
6 4.143790000 -2.097166000 2.475092000
1 4.063976000 -3.153199000 2.736044000
6 -0.870988000 3.652246000 -3.540665000
1 -1.473347000 3.500189000 -4.437639000
6 4.897439000 -1.246107000 3.278641000
1 5.411214000 -1.635448000 4.158874000
6 -0.818314000 -5.667710000 -0.259740000
1 -1.047325000 -6.530191000 0.371718000
6 -3.936375000 3.450301000 4.056054000
1 -2.988341000 3.437597000 4.617563000
1 -4.740169000 3.207511000 4.764468000
1 -4.089443000 4.478419000 3.699252000
6 5.768750000 2.675687000 1.424253000
1 6.367193000 2.538168000 2.336690000
1 5.743884000 3.752020000 1.199765000
1 6.293898000 2.165090000 0.604253000
6 0.135177000 -2.229289000 -2.660239000
1 0.050410000 -1.317037000 -2.049656000
1 -0.539393000 -2.099151000 -3.518320000
1 1.162275000 -2.307714000 -3.041854000
6 2.124690000 5.530404000 0.208950000
1 1.472453000 6.411705000 0.124106000
1 2.866303000 5.583637000 -0.600900000
1 2.655686000 5.605610000 1.168833000
6 -2.913848000 -4.585107000 0.631333000
1 -3.039055000 -5.563206000 1.113419000
1 -3.818630000 -4.358239000 0.049441000
1 -2.855887000 -3.819476000 1.420253000
6 1.248156000 -6.884686000 -1.071578000
1 2.071161000 -6.731731000 -0.354111000
1 1.703517000 -7.043928000 -2.059018000
6 0.544804000 1.466540000 -5.269732000
1 -0.107844000 2.114662000 -5.873645000
1 0.607801000 0.491054000 -5.773740000
1 1.547949000 1.917193000 -5.264837000
6 1.699874000 -3.408587000 1.341908000
1 2.225442000 -4.119696000 1.996950000
1 1.016219000 -3.981610000 0.705045000
1 1.100461000 -2.749762000 1.989386000
6 3.619605000 -3.506272000 -0.315649000
1 4.275137000 -2.921398000 -0.976941000
1 3.041470000 -4.207935000 -0.930641000
1 4.262067000 -4.090741000 0.360162000
6 -1.399544000 0.655828000 -3.846031000
1 -1.735928000 0.427192000 -2.826722000
1 -1.390417000 -0.282260000 -4.417730000
1 -2.143812000 1.319575000 -4.309891000
1 0.726201000 -7.806087000 -0.779702000

## Sheet: Int 2A
Cartesian Cooradinations
Int2A					BP86-D3(BJ)/def2-SVP
0, 1
50 2.785724000 17.602347000 10.603140000
17 0.513460000 18.322487000 10.928055000
15 5.452650000 16.723369000 12.162345000
7 6.379409000 17.548113000 13.414516000
7 5.353801000 15.350491000 13.243099000
6 3.129565000 17.693062000 8.490920000
6 2.846143000 16.562969000 7.699882000
6 3.626868000 18.898473000 7.953158000
6 3.842918000 18.961796000 6.560468000
1 4.233640000 19.892678000 6.120197000
6 2.338824000 15.304668000 8.327441000
6 3.072906000 16.657610000 6.309411000
1 2.862464000 15.784589000 5.671777000
6 3.672738000 13.562144000 12.931868000
6 5.009364000 14.038644000 12.817898000
6 3.565446000 17.848307000 5.749064000
1 3.738880000 17.908214000 4.663010000
6 3.264947000 14.355365000 8.837503000
6 0.939814000 15.047767000 8.375959000
6 5.167099000 20.124192000 9.524219000
6 6.039321000 13.202947000 12.293374000
6 8.162000000 18.901001000 12.382543000
6 2.909626000 21.031174000 9.099945000
6 3.882762000 17.590179000 12.283821000
1 3.314197000 17.749336000 13.219919000
6 6.997215000 18.811643000 13.205587000
6 5.366487000 15.758240000 14.645825000
1 5.634307000 14.896292000 15.290591000
1 4.374568000 16.143558000 14.995286000
6 3.910031000 20.047063000 8.867595000
6 2.554238000 14.471710000 13.425810000
1 2.992898000 15.483124000 13.528046000
6 6.422356000 16.872750000 14.714612000
1 6.210400000 17.573318000 15.551738000
1 7.434439000 16.436199000 14.899631000
6 6.450729000 19.976174000 13.816107000
6 5.155041000 19.919856000 14.616411000
1 4.807668000 18.868571000 14.585362000
6 3.396806000 12.230073000 12.568221000
1 2.369746000 11.844976000 12.667952000
6 5.706825000 11.892033000 11.898498000
1 6.490518000 11.234030000 11.490219000
6 3.198371000 22.085705000 9.985076000
1 2.426697000 22.853039000 10.164316000
6 6.223841000 19.070616000 9.310078000
1 6.006616000 18.153172000 9.904434000
1 7.210604000 19.437067000 9.649555000
1 6.295655000 18.756888000 8.249565000
6 2.774631000 13.143988000 9.359868000
1 3.493902000 12.410455000 9.753640000
6 0.498209000 13.827116000 8.916596000
1 -0.585496000 13.625480000 8.952759000
6 5.370819000 20.314761000 16.089489000
1 6.152938000 19.691001000 16.570508000
1 4.431819000 20.199861000 16.670849000
1 5.691108000 21.374645000 16.180696000
6 7.117031000 21.206754000 13.647849000
1 6.715214000 22.108698000 14.137279000
6 5.408562000 21.194858000 10.405045000
1 6.378062000 21.246264000 10.924495000
6 2.030889000 14.031773000 14.806036000
1 1.254360000 14.733738000 15.176403000
1 2.848151000 13.994939000 15.555414000
1 1.574980000 13.019555000 14.759944000
6 4.443179000 22.192009000 10.636604000
6 8.765496000 17.642042000 11.763232000
1 7.916577000 17.002549000 11.437419000
6 9.643299000 17.901539000 10.530446000
1 10.581894000 18.434951000 10.792273000
1 9.115499000 18.498937000 9.760126000
1 9.936850000 16.937507000 10.066469000
6 4.746379000 14.636531000 8.846545000
1 5.096293000 15.080529000 7.892897000
1 5.322614000 13.714415000 9.050077000
1 5.010644000 15.360823000 9.651942000
6 1.398982000 12.856557000 9.399482000
6 7.474092000 13.708816000 12.189540000
1 7.509016000 14.646099000 12.782123000
6 4.401597000 11.399639000 12.052068000
1 4.166205000 10.363186000 11.761544000
6 1.414405000 14.593491000 12.401189000
1 0.864946000 13.637822000 12.271908000
1 1.805422000 14.878085000 11.402435000
1 0.681912000 15.365799000 12.714603000
6 4.053232000 20.768912000 13.956341000
1 4.302354000 21.849990000 13.984889000
1 3.086608000 20.634444000 14.486277000
1 3.912757000 20.475236000 12.897357000
6 1.561469000 20.936478000 8.425107000
1 1.658223000 20.746022000 7.336968000
1 0.977398000 21.866527000 8.568276000
1 0.966684000 20.098269000 8.847441000
6 8.767632000 20.160315000 12.208595000
1 9.664206000 20.248886000 11.577312000
6 8.264209000 21.303724000 12.850133000
1 8.765949000 22.275304000 12.717433000
6 7.845941000 14.075881000 10.740310000
1 8.890908000 14.447460000 10.685578000
1 7.180379000 14.871462000 10.351993000
1 7.764134000 13.195785000 10.066719000
6 9.561968000 16.849326000 12.820613000
1 9.952852000 15.903040000 12.391491000
1 8.934621000 16.592467000 13.694845000
1 10.426042000 17.443979000 13.185895000
6 0.891268000 11.554356000 9.970471000
1 1.715152000 10.832717000 10.133387000
1 0.141330000 11.081899000 9.302390000
1 0.389999000 11.717661000 10.949777000
6 8.488448000 12.724541000 12.797077000
1 8.559490000 11.784107000 12.209874000
1 8.215260000 12.452097000 13.837195000
1 9.502309000 13.176669000 12.815289000
6 4.746739000 23.371804000 11.528831000
1 4.998699000 24.269769000 10.922839000
1 5.609640000 23.163308000 12.190181000
1 3.876116000 23.641258000 12.161142000
6 -0.048091000 16.073211000 7.872487000
1 -0.069555000 16.960203000 8.541783000
1 -1.073212000 15.655959000 7.833473000
1 0.220140000 16.442000000 6.861593000

## Sheet: Distannyne
Cartesian Cooradinations
Distannyne					BP86-D3(BJ)/def2-TZVPP
0, 1
50 -1.192294000 0.055911000 0.599247000
6 -1.771997000 -1.322392000 2.231171000
6 -0.919118000 -2.324420000 2.737869000
6 -1.362612000 -3.155909000 3.774373000
6 -2.645385000 -2.999494000 4.309164000
6 -3.494661000 -2.008320000 3.809000000
6 -3.064309000 -1.168898000 2.772567000
6 -3.958226000 -0.103094000 2.223621000
6 -4.809574000 -0.396284000 1.131147000
6 -5.657943000 0.609295000 0.649270000
6 -5.660635000 1.879988000 1.223891000
6 -4.788531000 2.173696000 2.271710000
6 -3.923823000 1.196941000 2.783036000
6 -4.818525000 -1.773858000 0.486488000
6 -4.439115000 -1.697150000 -1.000086000
6 -6.169290000 -2.478217000 0.692391000
6 -2.978163000 1.538898000 3.924220000
6 -3.753103000 1.856697000 5.213309000
6 -2.024473000 2.679690000 3.538919000
6 0.445600000 -2.475283000 2.150348000
6 1.518312000 -1.718449000 2.678311000
6 2.780383000 -1.839781000 2.084958000
6 2.974868000 -2.675640000 0.983703000
6 1.907502000 -3.409285000 0.462138000
6 0.629911000 -3.315526000 1.026827000
6 1.301561000 -0.791938000 3.864933000
6 1.771299000 -1.466429000 5.165603000
6 1.957993000 0.581749000 3.675222000
6 -0.538220000 -4.096236000 0.444248000
6 -0.600498000 -4.020240000 -1.086894000
6 -0.508502000 -5.554257000 0.934880000
1 -0.695475000 -3.929423000 4.161774000
1 -2.983345000 -3.651573000 5.116615000
1 -4.498424000 -1.880543000 4.220916000
1 -6.327167000 0.394295000 -0.186587000
1 -6.335958000 2.649593000 0.843701000
1 -4.780292000 3.177936000 2.700852000
1 -4.048828000 -2.376817000 0.991024000
1 -5.176169000 -1.115963000 -1.576088000
1 -4.384955000 -2.704204000 -1.440152000
1 -3.456839000 -1.216966000 -1.126937000
1 -6.408566000 -2.567151000 1.762110000
1 -6.147940000 -3.489613000 0.258857000
1 -6.986906000 -1.920857000 0.209527000
1 -2.362331000 0.647872000 4.117638000
1 -4.393396000 2.743127000 5.084467000
1 -3.058332000 2.059150000 6.042565000
1 -4.398542000 1.014600000 5.502689000
1 -1.457700000 2.423413000 2.630919000
1 -1.303007000 2.872572000 4.346998000
1 -2.570438000 3.615887000 3.343424000
1 3.618335000 -1.254238000 2.466706000
1 3.956890000 -2.737224000 0.514974000
1 2.069256000 -4.039949000 -0.413592000
1 0.216700000 -0.625086000 3.950350000
1 1.245259000 -2.418048000 5.329453000
1 1.582649000 -0.814699000 6.032597000
1 2.851025000 -1.679394000 5.125382000
1 1.681549000 1.252450000 4.502608000
1 1.626371000 1.040919000 2.732055000
1 3.056352000 0.515058000 3.657648000
1 -1.459728000 -3.634305000 0.830957000
1 0.249750000 -4.534296000 -1.560191000
1 -0.598350000 -2.972363000 -1.422047000
1 -1.520793000 -4.498968000 -1.453867000
1 -1.372022000 -6.114468000 0.544318000
1 -0.535399000 -5.602415000 2.033087000
1 0.409481000 -6.059784000 0.596430000
50 1.191989000 -0.057031000 -0.600228000
6 1.771956000 1.322230000 -2.231282000
6 0.919281000 2.324728000 -2.737397000
6 1.362650000 3.156208000 -3.773964000
6 2.645121000 2.999370000 -4.309353000
6 3.494267000 2.007860000 -3.809641000
6 3.064030000 1.168436000 -2.773166000
6 3.957859000 0.102413000 -2.224504000
6 4.810713000 0.395869000 -1.133287000
6 5.658819000 -0.609977000 -0.651509000
6 5.659873000 -1.881152000 -1.225073000
6 4.786376000 -2.175050000 -2.271673000
6 3.921810000 -1.198066000 -2.782807000
6 2.975025000 -1.540018000 -3.923061000
6 3.748940000 -1.855049000 -5.213463000
1 4.390862000 -2.740547000 -5.086297000
1 3.053539000 -2.057698000 -6.042146000
1 4.392641000 -1.011545000 -5.502619000
6 2.023364000 -2.682600000 -3.538124000
1 1.457643000 -2.428388000 -2.628895000
1 1.300931000 -2.875028000 -4.345442000
1 2.570678000 -3.618496000 -3.345001000
1 2.357724000 -0.649594000 -4.114599000
1 4.776930000 -3.179615000 -2.700018000
1 6.335032000 -2.650965000 -0.845010000
1 6.329106000 -0.394826000 0.183463000
6 4.821052000 1.773782000 -0.489373000
6 4.439027000 1.698184000 0.996608000
1 5.173953000 1.115515000 1.573836000
1 4.386216000 2.705414000 1.436447000
1 3.455582000 1.219993000 1.122004000
6 6.173281000 2.475889000 -0.693212000
1 6.414676000 2.563780000 -1.762541000
1 6.152676000 3.487586000 -0.260353000
1 6.989194000 1.917666000 -0.208477000
1 4.053187000 2.377812000 -0.995412000
1 4.497858000 1.879862000 -4.221908000
1 2.982940000 3.651377000 -5.116922000
1 0.695563000 3.929892000 -4.161112000
6 -0.445188000 2.475941000 -2.149386000
6 -1.518805000 1.721475000 -2.678738000
6 -2.780662000 1.842892000 -2.084868000
6 -2.974050000 2.676731000 -0.981946000
6 -1.905786000 3.408247000 -0.459121000
6 -0.628375000 3.314129000 -1.024074000
6 0.540948000 4.092133000 -0.440243000
6 0.600041000 4.018614000 1.091088000
1 -0.249175000 4.536525000 1.562039000
1 0.593669000 2.971323000 1.427986000
1 1.521372000 4.494679000 1.458902000
6 0.516899000 5.549401000 -0.933470000
1 1.381298000 6.107570000 -0.541923000
1 0.546476000 5.595570000 -2.031682000
1 -0.400277000 6.058319000 -0.597935000
1 1.461791000 3.626595000 -0.824269000
1 -2.066777000 4.037318000 0.417871000
1 -3.955901000 2.738444000 -0.512873000
1 -3.619305000 1.259019000 -2.467707000
6 -1.303625000 0.797200000 -3.867377000
6 -1.778959000 1.472452000 -5.165601000
1 -1.255659000 2.425554000 -5.329683000
1 -1.591483000 0.822412000 -6.034115000
1 -2.859042000 1.682891000 -5.121826000
6 -1.956596000 -0.578144000 -3.677364000
1 -1.681867000 -1.247088000 -4.506749000
1 -1.620767000 -1.038043000 -2.736039000
1 -3.054999000 -0.513511000 -3.655675000
1 -0.218706000 0.632836000 -3.956482000
